# Supplementary material for: miEAA: microRNA enrichment analysis and annotation
Source: PubMed Central journal article supplement — Nucleic Acids Res. 2016 Apr 29;44(Web Server issue):W110–6. doi: 10.1093/nar/gkw345 (PMC4987907; doi:10.1093/nar/gkw345), 2016-04-29
Supplement: supp_gkw345_nar-00177-web-b-2016-File004.pdf [file supp_gkw345_nar-00177-web-b-2016-File004.pdf]

## Supplementary Figure 1

### Annotations for analyzed miRNAs/precursors

| miRNA/precursor | category                       | number significant subcategories | subcategory                                                                                                                                                                                                                                                                                                                                                                                                                                                                                                                                                                                                                                                                                                                                                                                                          |
|-----------------|--------------------------------|----------------------------------|----------------------------------------------------------------------------------------------------------------------------------------------------------------------------------------------------------------------------------------------------------------------------------------------------------------------------------------------------------------------------------------------------------------------------------------------------------------------------------------------------------------------------------------------------------------------------------------------------------------------------------------------------------------------------------------------------------------------------------------------------------------------------------------------------------------------|
| hsa-miR-200b-3p | Chromosomal location (miRBase) | 1                                | Chromosome 1                                                                                                                                                                                                                                                                                                                                                                                                                                                                                                                                                                                                                                                                                                                                                                                                         |
|                 | Diseases (miRWalk)             | 3                                | Lymphoma B-Cell Marginal Zone; Nephrosclerosis; Proteinuria                                                                                                                                                                                                                                                                                                                                                                                                                                                                                                                                                                                                                                                                                                                                                          |
|                 | Organs (miRWalk)               | 4                                | Cytoskeleton; Lymphoid Tissue; Ovary; Adipose Tissue                                                                                                                                                                                                                                                                                                                                                                                                                                                                                                                                                                                                                                                                                                                                                                 |
|                 | Pathways (miRWalk)             | 6                                | WP712 Estrogen signaling pathway; WP437 EGF EGFR Signaling Pathway; hsa05213 Endometrial cancer; hsa04650 Natural killer cell mediated cytotoxicity; hsa05222 Small cell lung cancer; WP2034 Leptin signaling pathway                                                                                                                                                                                                                                                                                                                                                                                                                                                                                                                                                                                                |
|                 | Gene Ontology (miRWalk)        | 17                               | GO0005168 neurotrophin trka receptor binding; GO0035455 response to interferon alpha; GO0045446 endothelial cell differentiation; GO0048568 embryonic organ development; GO0051291 protein heterooligomerization; GO0051726 regulation of cell cycle; GO0000978 rna polymerase ii core promoter proximal region sequence specific dna binding; GO0030056 hemidesmosome; GO0045930 negative regulation of mitotic cell cycle; GO0048538 thymus development; GO0048704 embryonic skeletal system morphogenesis; GO0030857 negative regulation of epithelial cell differentiation; GO0035265 organ growth; GO0030968 endoplasmic reticulum unfolded protein response; GO0017112 rab guanyl nucleotide exchange factor activity; GO0032469 endoplasmic reticulum calcium ion homeostasis; GO0014823 response to activity |
|                 | Target genes (miRTarbase)      | 19                               | KLF11; KLHL20; ERBB2IP; WASF3; ZFPM2; ZEB1; RASSF2; TCF7L1; ZEB2; HOXB5; WDR37; PTPRD; SHC1; BAP1; RIN2; VAC14; SEPT7; ELMO2; BCL2                                                                                                                                                                                                                                                                                                                                                                                                                                                                                                                                                                                                                                                                                   |
|                 | total number                   | 50                               | -                                                                                                                                                                                                                                                                                                                                                                                                                                                                                                                                                                                                                                                                                                                                                                                                                    |

### Significant annotation view

This screenshot shows the found significant categories for miRNA miR-200b-3p for the performed ORA. This miRNA had the most annotations.

## Supplementary Figure 2

### Sequence properties for miRNAs/precursors

| precursor    | miRNA 5p        | miRNA 3p        | precursor sequence                                                                                                             | 5p sequence             | 3p sequence            | MFE precursor | MFE 5p | MFE 3p | sequence length precursor | sequence length 5p | sequence length 3p |
|--------------|-----------------|-----------------|--------------------------------------------------------------------------------------------------------------------------------|-------------------------|------------------------|---------------|--------|--------|---------------------------|--------------------|--------------------|
| hsa-mir-21   | hsa-miR-21-5p   | hsa-miR-21-3p   | UGUCGGGUAGCUUAUCAGACUGAUGUU<br>GACUGUUGAAUCUCAUGGCAACACCAG<br>UCGAUGGGCUGUCUGACA                                               | UAGCUUAUCAGACUGAUGUUGA  | CAACACCAGUCGAUGGGCUGU  | -34.60        | -0.80  | -6.00  | 72                        | 22                 | 21                 |
| hsa-mir-96   | hsa-miR-96-5p   | hsa-miR-96-3p   | UGGCCGAUUUUGGCACUAGCACAUUUU<br>UGCUUGUGUCUCUCCGCUCUGAGCAAU<br>CAUGUGCAGUGCCAAUAUGGGAAA                                         | UUUGGCACUAGCACAUUUUUGCU | AAUCAUGUGCAGUGCCAAUAUG | -34.80        | -2.10  | -0.80  | 78                        | 23                 | 22                 |
| hsa-mir-183  | hsa-miR-183-5p  | hsa-miR-183-3p  | CCGCAGAGUGGACUCCUGUUCUGUGU<br>AUGGCACUGGUAGAAUUCACUGUGAAC<br>AGUCUCAGUCAGUGAAUACCGAAGGG<br>CCAUAACAGAGCAGACAGAUCCACG<br>A      | UAUGGCACUGGUAGAAUUCACU  | GUGAAUUACCGAAGGGCCAUAA | -41.00        | 0.00   | -1.20  | 110                       | 22                 | 22                 |
| hsa-mir-141  | hsa-miR-141-5p  | hsa-miR-141-3p  | CGCCGGCCUUGGGUCCAUCUUCAGU<br>ACAGUGUUGGAUGGUCUAAUUGUGAAG<br>CUCCUAAACACUGUCUGGUAAGAUGGC<br>UCCCGGGUGGGUUC                      | CAUCUUCAGUACAGUGUUGGA   | UAACACUGUCUGGUAAGAUGG  | -49.00        | -2.20  | -4.00  | 95                        | 22                 | 22                 |
| hsa-mir-135b | hsa-miR-135b-5p | hsa-miR-135b-3p | CACUCUGCUGGGCCUAUGGCCUUUUA<br>UUCUUAUGUGAUUGCUGUCCAAACUC<br>AUGUAGGGCUAAAAGCCAUGGGCUACA<br>GUGAGGGGCGAGCUCC                    | UAUGGCCUUUUAUCCUAUGUGA  | AUGUAGGGCUAAAAGCCAUGGG | -46.70        | -1.10  | -4.30  | 97                        | 23                 | 22                 |
| hsa-mir-210  | hsa-miR-210-5p  | hsa-miR-210-3p  | ACCCGGCAGUGCCUCCAGGCGCAGGGC<br>AGCCCCUGCCCACCGCACACUGCGCUG<br>CCCCAGACCCACUGUGCGUGUGACAGC<br>GGCUGAUCUGUGCCUGGGCAGCGCGAC<br>CC | AGCCCCUGCCCACCGCACACUG  | CUGUGCGUGUGACAGCGGCUGA | -57.80        | -1.10  | -2.30  | 110                       | 22                 | 22                 |
| hsa-mir-130b | hsa-miR-130b-5p | hsa-miR-130b-3p | GGCCUGCCCCGACACUCUUUCCUGUUG<br>CACUACUUAUAGGCCGUGGGAAGCAGU<br>GCAAUGAUGAAAGGGCAUCGGUCAGGU<br>C                                 | ACUCUUUCCUGUUGCACUAC    | CAGUGCAAUGAUGAAAGGGCAU | -35.80        | 0.00   | -1.40  | 82                        | 21                 | 22                 |
| hsa-mir-200b | hsa-miR-200b-5p | hsa-miR-200b-3p | CCAGCUCGGGCAGCCUGGCCAUUCUUA<br>CUGGGCAGCAUUGGAUGGAGUCAGGUC<br>UCUAAUACUGCCUGGUAUUGAUGACGG<br>CGGAGCCCUGCACG                    | CAUCUUACUGGGCAGCAUUGGA  | UAAUACUGCCUGGUAUUGAUGA | -42.90        | 0.00   | -0.60  | 95                        | 22                 | 22                 |

### Sequence properties view

This screenshot shows the sequences of the precursors and the mature miRNAs, as well as the minimum free energy (MFE) computed with RNAfold.
